# Supplementary material
Source: HighWire-hosted journal article supplement (https://bmjopenquality.bmj.com/content/9/2/e000698)
Supplement: inline-supplementary-material-2 [file inline-supplementary-material-2.pdf]

Additional File 2

Table. Template of the worksheet for hazard analysis and identification of actions\*

| Process/<br>Subprocess | Failure<br>mode | Potential<br>cause | Effect | Risk scoring |             |        | Decision tree analysis    |                              |             |          | Action type<br>(eliminate,<br>control,<br>mitigate) | Action | Outcome<br>measure | Person<br>Responsible |
|------------------------|-----------------|--------------------|--------|--------------|-------------|--------|---------------------------|------------------------------|-------------|----------|-----------------------------------------------------|--------|--------------------|-----------------------|
|                        |                 |                    |        | Severity     | Probability | Hazard | Single point<br>weakness? | Existing control<br>measure? | Detectable? | Proceed? |                                                     |        |                    |                       |
|                        |                 |                    |        |              |             |        |                           |                              |             |          |                                                     |        |                    |                       |
|                        |                 |                    |        |              |             |        |                           |                              |             |          |                                                     |        |                    |                       |
|                        |                 |                    |        |              |             |        |                           |                              |             |          |                                                     |        |                    |                       |
|                        |                 |                    |        |              |             |        |                           |                              |             |          |                                                     |        |                    |                       |
|                        |                 |                    |        |              |             |        |                           |                              |             |          |                                                     |        |                    |                       |
|                        |                 |                    |        |              |             |        |                           |                              |             |          |                                                     |        |                    |                       |
|                        |                 |                    |        |              |             |        |                           |                              |             |          |                                                     |        |                    |                       |
|                        |                 |                    |        |              |             |        |                           |                              |             |          |                                                     |        |                    |                       |

\*Adopted from DeRosier et al (1).

Reference

1. DeRosier J, Stalhandske E, Bagian JP, Nudell T. Using health care failure mode and effect analysis™: the VA National Center for Patient Safety’s prospective risk analysis system. The Joint Commission journal on quality improvement. 2002;28(5):248-67.
